# Supplementary material for: GiniClust3: a fast and memory-efficient tool for rare cell type identification
Source: PubMed Central journal article supplement (PMC7183612; doi:10.1186/s12859-020-3482-1), 2020-04-25
Supplement: 12859_2020_3482_MOESM1_ESM.pdf [file 12859_2020_3482_MOESM1_ESM.pdf]

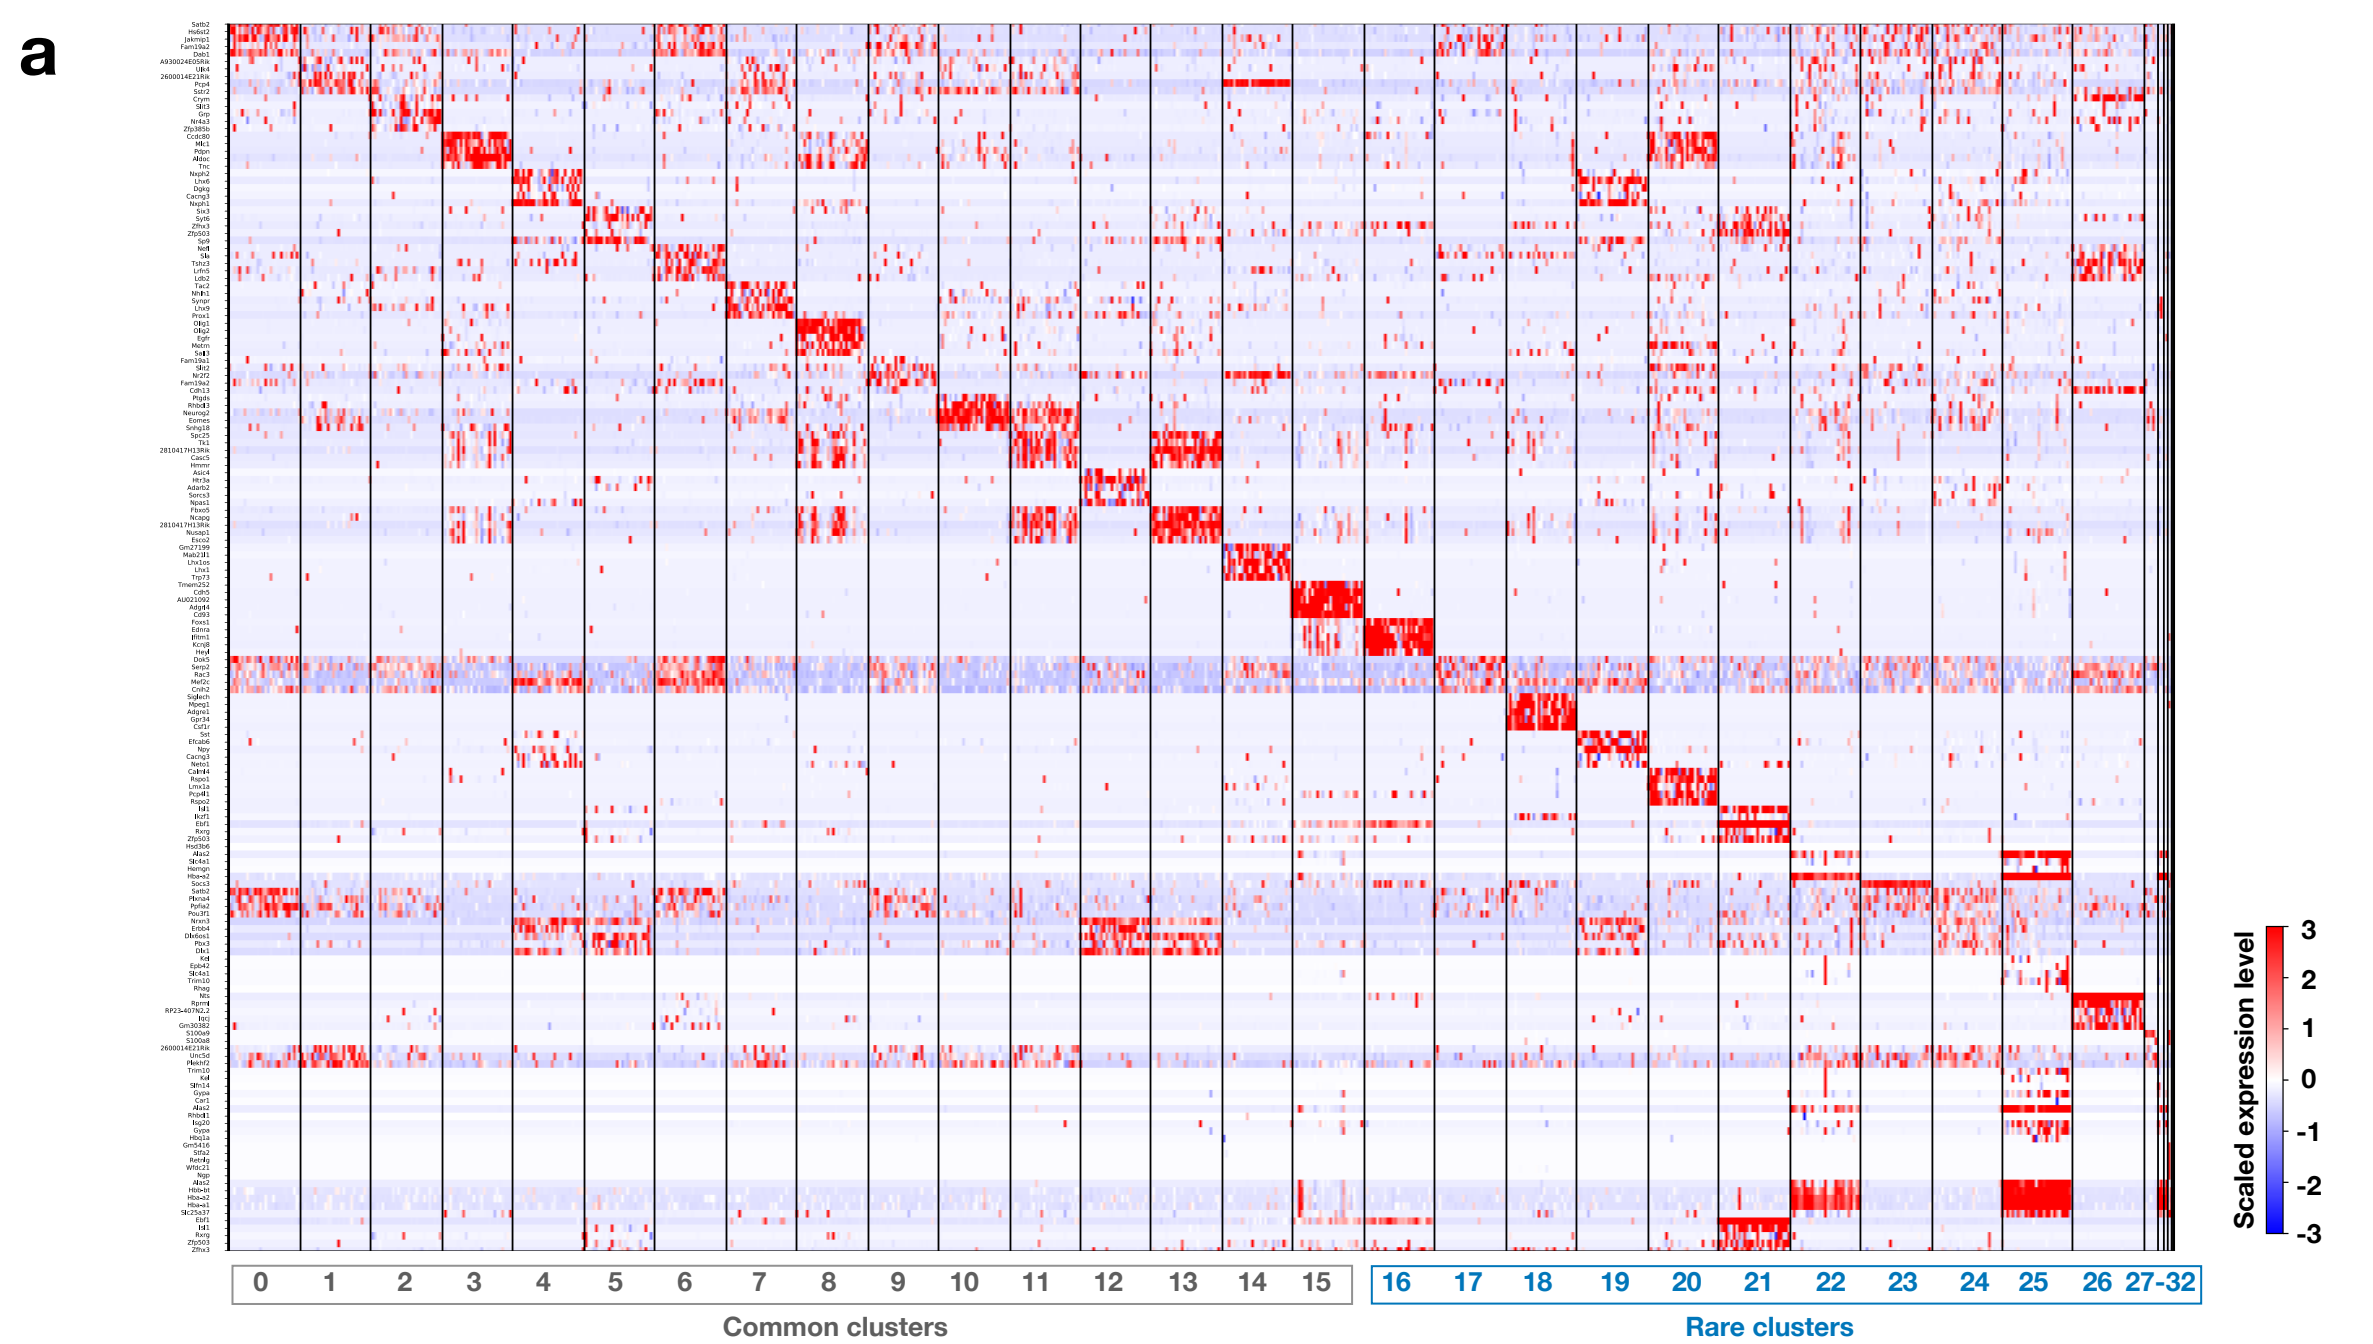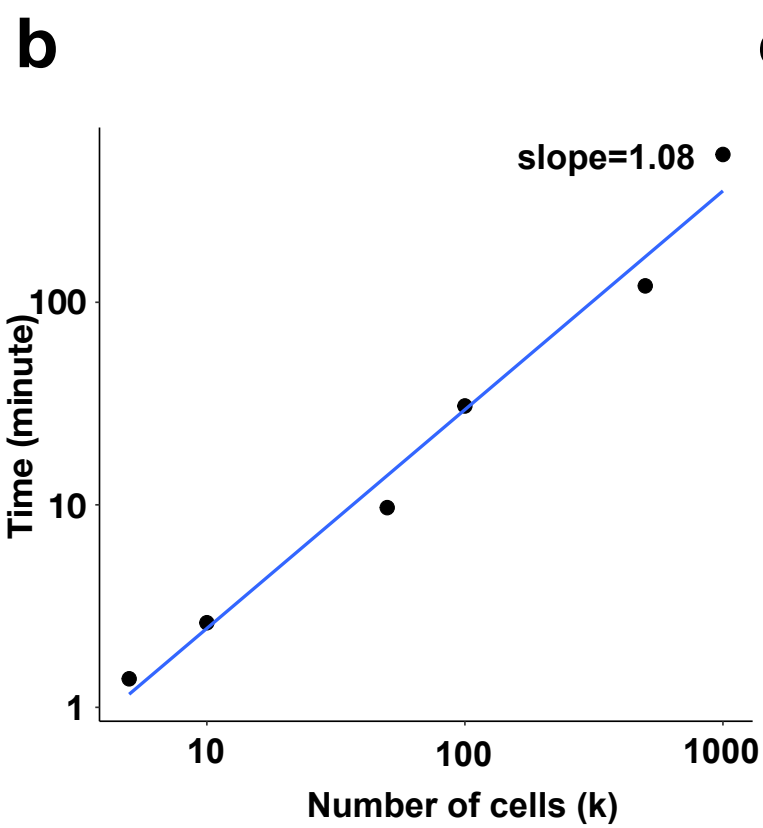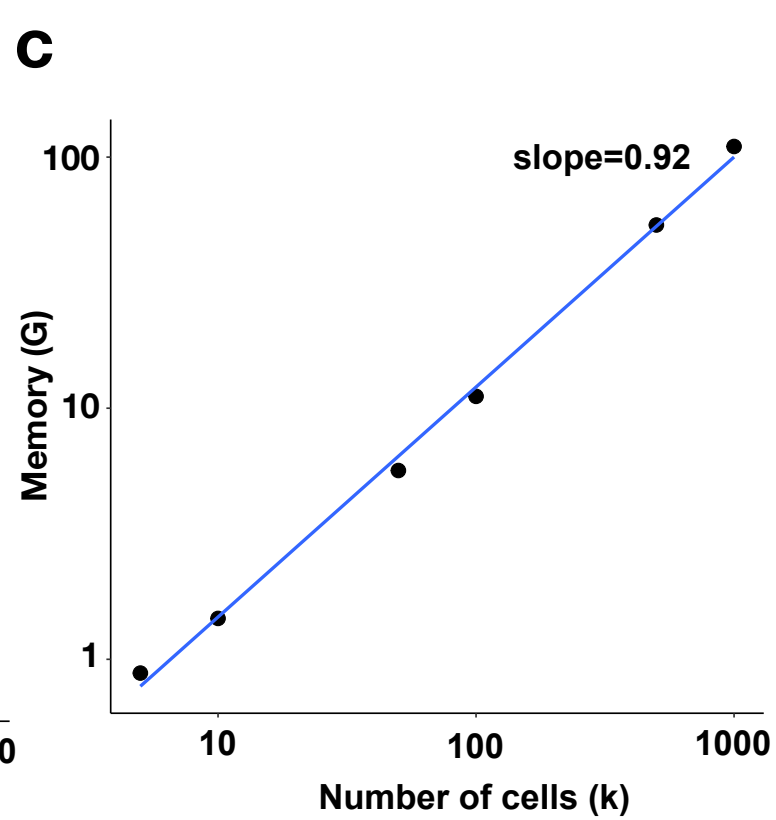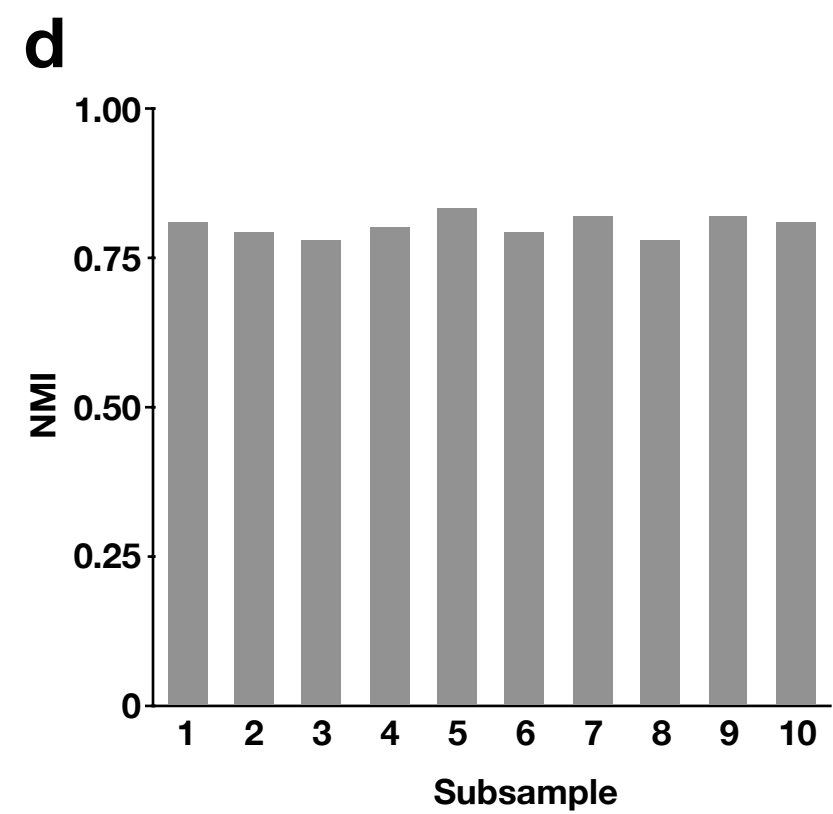

**Supplementary Fig. 1**
